# Supplementary material for: Effect of Erythropoietin on the Expression of Murine Transferrin Receptor 2
Source: MDPI journal article supplement (doi:10.3390/ijms22158209), 2021-07-30
Supplement: s1 [file s1]

**Table S2**

**Primers used for PCR analysis**

|                  |                          |                           |
|------------------|--------------------------|---------------------------|
| <i>Actb:</i>     | F: GCTACAGCTTCACCACCACA  | R: GGTCTTTACGGATGTCAACG   |
| <i>Cdc42bpa:</i> | F: GGATGAACTTGTGGTTCCTGA | R: ACCCATGTGTGCTATGTGGTT  |
| <i>Epor:</i>     | F: GGACCCTGTGACTATGGATGA | R: CCCCGAACGTGTAATCTGTTGA |
| <i>Fam132b:</i>  | F: ATGCTGTTCGTCAAGCAGAGT | R: CCTTCAGCAGAACCTCAGATG  |
| <i>Hamp:</i>     | F: CTGAGCAGCACCACTATCTC  | R: TGGCTCTAGGCTATGTTTTGC  |
| <i>Id1:</i>      | F: CGAGGTGGTACTTGGTCTGTC | R: CTGCAGGTCCCTGATGTAGTC  |
| <i>Mcoln1:</i>   | F: ATGAGCCCATGTGACAAGTTC | R: AGGTGTCATCAGACCCATCAG  |
| <i>Mfn2:</i>     | F: ACTGACCTGGACCACCAAAG  | R: TGGCTCTGCTCTGAAGTGAA   |
| <i>Tfr2:</i>     | F: CCCTATCTGGTCCTGATCACC | R: CAAGGAACCGGAGAAACATGG  |
| <i>Tfr1:</i>     | F: AAAGTGGCTGCAGATGAAGAA | R: ATAGCCCAGGTAGCCACTCAT  |
