# Supplementary material for: Effect of Erythropoietin on the Expression of Murine Transferrin Receptor 2
Source: MDPI journal article supplement (doi:10.3390/ijms22158209), 2021-07-30
Supplement: s1 [file s1]

**Table S3****Reagents used in immunophenotyping of hematopoietic cells**

| <b>Antibody</b>         | <b>Clone</b> | <b>Producer</b>                                                   | <b>Fluorochrome</b>   |
|-------------------------|--------------|-------------------------------------------------------------------|-----------------------|
| CD117 (c-kit)           | 2b8          | <a href="http://www.biolegend.com/">http://www.biolegend.com/</a> | Brilliant Violet 421™ |
| CD71                    | RI7217       | <a href="http://www.biolegend.com/">http://www.biolegend.com/</a> | FITC                  |
| CD44                    | IM7          | <a href="http://www.biolegend.com/">http://www.biolegend.com/</a> | PE                    |
| CD45R/B220              | RA3-6B2      | <a href="http://www.biolegend.com/">http://www.biolegend.com/</a> | APC/Cy7               |
| Ly-6G(Gr-1)             | RB6-8C5      | <a href="http://www.biolegend.com/">http://www.biolegend.com/</a> | APC/Cy7               |
| CD11b                   | M1/70        | <a href="http://www.biolegend.com/">http://www.biolegend.com/</a> | APC/Cy7               |
| TER-119/Erythroid Cells | TER119       | <a href="http://www.biolegend.com/">http://www.biolegend.com/</a> | Brilliant Violet 785™ |
