# Supplementary material for: Effect of Erythropoietin on the Expression of Murine Transferrin Receptor 2
Source: MDPI journal article supplement (doi:10.3390/ijms22158209), 2021-07-30
Supplement: s1 [file s1]

**Table S1. Red blood cell parameters, spleen size and iron concentrations.**

|         | 0h             | 4h             | 16h            | 24h            | 48h            | 72h            | 96h            |
|---------|----------------|----------------|----------------|----------------|----------------|----------------|----------------|
| RBC     | 10.4 $\pm$ 0.5 | 10.0 $\pm$ 0.5 | 10.6 $\pm$ 0.6 | 10.5 $\pm$ 0.6 | 10.6 $\pm$ 0.4 | 10.6 $\pm$ 0.2 | 10.8 $\pm$ 0.3 |
| Hb      | 159 $\pm$ 8    | 167 $\pm$ 5    | 162 $\pm$ 2    | 163 $\pm$ 7    | 166 $\pm$ 7    | 169 $\pm$ 4    | 172 $\pm$ 4*   |
| HCT     | 46 $\pm$ 2     | 45 $\pm$ 5     | 45 $\pm$ 3     | 46 $\pm$ 2     | 49 $\pm$ 1*    | 51 $\pm$ 2*    | 51 $\pm$ 1*    |
| MCV     | 45 $\pm$ 1     | 46 $\pm$ 2     | 46 $\pm$ 2     | 45 $\pm$ 1     | 48 $\pm$ 1*    | 47 $\pm$ 1*    | 47 $\pm$ 1*    |
| Spleen  | 64 $\pm$ 6     | 83 $\pm$ 22    | 78 $\pm$ 11    | 77 $\pm$ 9     | 127 $\pm$ 26*  | 137 $\pm$ 11*  | 111 $\pm$ 10*  |
| Fe (Pl) | 20 $\pm$ 4     | 21 $\pm$ 3     | 18 $\pm$ 6     | 33 $\pm$ 7*    | 23 $\pm$ 9     | 17 $\pm$ 7     | 26 $\pm$ 15    |

EPO was administered at 200 U/mouse; mice were sacrificed at indicated time intervals.  
RBC: Red blood cells (millions/ $\mu$ l); Hb: Hemoglobin (g/litre); HCT: Hematocrit (%); MCV: Mean cell volume (fl); Spleen: Spleen weight (mg); Fe (Pl): Plasma iron ( $\mu$ mol/l). Asterisk denotes statistical significance ( $p < 0.05$ );  $n = 4$ .
