# Supplementary material for: Effect of Erythropoietin on the Expression of Murine Transferrin Receptor 2
Source: MDPI journal article supplement (doi:10.3390/ijms22158209), 2021-07-30
Supplement: s1 [file s1]

**Figure S1. Single injection of EPO upregulates *Epor* and *Cdc42bpa* mRNA in the spleen.**

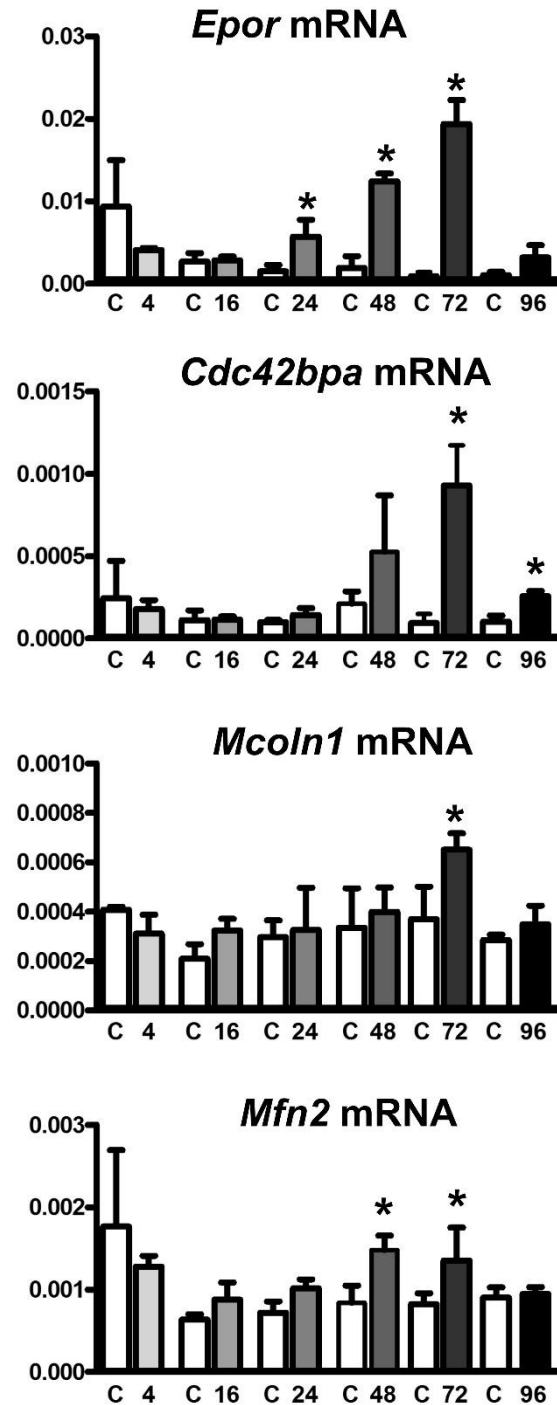

EPO was administered at 200 U/mouse and target gene expression was determined at the indicated time points (4, 16, 24, 48, 72 and 96 h post EPO injection) in groups of three control mice (C) and three EPO-treated mice. Target mRNA content is expressed relative to *Actb* expression, asterisks denote statistical significance between EPO-treated groups and the respective control groups.
